# Supplementary material for: Evaluation of the Specific Capacitance of High-Entropy Oxide-Based Electrode Materials in View of Their Use for Water Desalination via Capacitive Method
Source: MDPI journal article supplement (doi:10.3390/app13020721), 2023-01-04
Supplement: s1 [file s1]

Article

# Evaluation of the electrochemical performance of high-entropy oxide-based electrode materials for water desalination via capacitive method

Claudia Triolo <sup>1,2,\*</sup>, Saveria Santangelo <sup>1,2,\*</sup>, Beatrix Petrovičová <sup>1</sup>, Maria Grazia Musolino <sup>1,2</sup>, Inés Rincón <sup>3</sup>, Ainhoa Atxirika <sup>3</sup>, Silvia Gil <sup>3</sup> and Yolanda Belaustegui <sup>3</sup>

<sup>1</sup> Dipartimento di Ingegneria Civile, dell'Energia, dell'Ambiente e dei Materiali (DICEAM), Università "Mediterranea", Loc. Feo di Vito, 89122 Reggio Calabria, Italy; claudia.triolo@unirc.it (C.T.); beatrix.petrovicova@unirc.it (B.P.); mariagrazia.musolino@unirc.it (M.G.M.)

<sup>2</sup> National Reference Center for Electrochemical Energy Storage (GISEL), Consorzio Interuniversitario Nazionale per la Scienza e Tecnologia dei Materiali (INSTM), 50121 Firenze, Italy

<sup>3</sup> Parque Científico y Tecnológico de Bizkaia, TECNALIA, Basque Research and Technology Alliance (BRTA), Astondo Bidea, Edif. 700, Derio, 48160 Bizkaia, Spain; ines.rincon@tecnalia.com (I.R.); ainhoa.atxirika@tecnalia.com (A.A.); silvia.gil@tecnalia.com (S.G.); yolanda.belaustegui@tecnalia.com (Y.B.)

\* Correspondence: saveria.santangelo@unirc.it

## Supplementary Materials

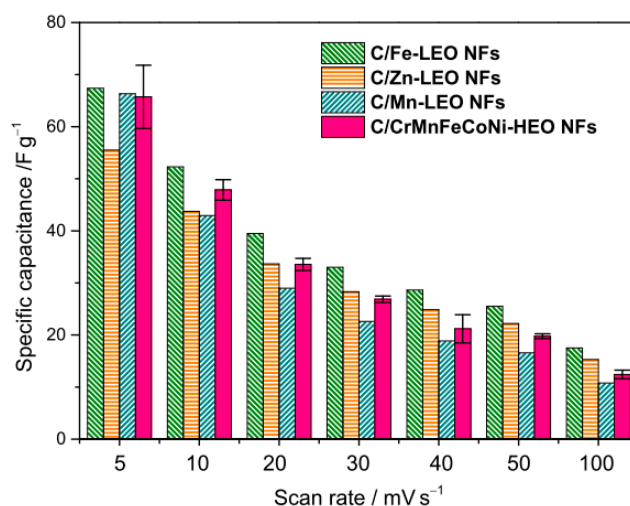

**Figure S1.** Specific capacitance of the best performing C/CrMnFeCoNi-HEO NFs compared to specific capacitance of C/Fe-, C/Zn- and C/Mn-LEO NFs [S1]. The total amount of metals (relative to PAN) in the spinnable solution is 38.5 wt% in the case of C/Mn-LEO and C/CrMnFeCoNi-HEO NFs and 57.7 wt% in the case of C/Fe- and C/Zn-LEO NFs.

- S1. Santangelo, S.; Pantò, F.; Triolo, C.; Stelitano, S.; Frontera, P.; Fernandez-Carretero, F.; Rincon, I.; Azpiroz, P.; Garcia-Luis, A.; Belaustegui, Y. Evaluation of the electrochemical performance of electrospun transition metal oxide-based electrode nanomaterials for water CDI applications. *Electrochim. Acta* **2019**, *309*, 125–139.
